# Supplementary material for: A novel platform for virus-like particle-display of flaviviral envelope domain III: induction of Dengue and West Nile virus neutralizing antibodies
Source: PubMed Central journal article supplement (PMC3668303; doi:10.1186/1743-422x-10-129), 2013-04-24
Supplement: 1743-422X-10-129-S3.pdf [file 1743-422X-10-129-S3.pdf]

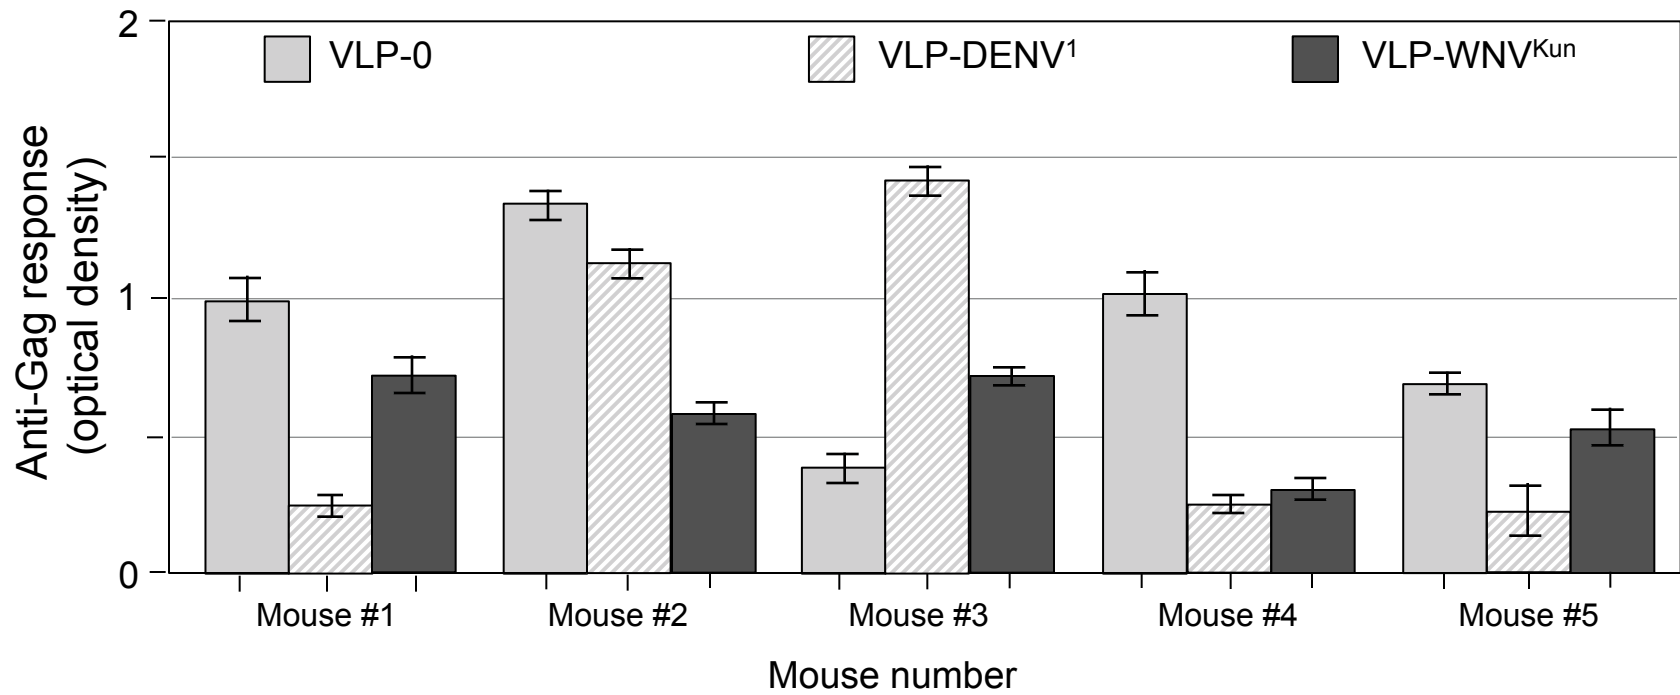

Supplementary Figure S3
